# Supplementary material for: Identification and Analysis of Genes and Pseudogenes within Duplicated Regions in the Human and Mouse Genomes
Source: PubMed Central journal article supplement (PMC1484586; doi:10.1371/journal.pcbi.0020076), 2006-06-30
Supplement: pcbi.0020076.sg002.pdf [file pcbi.0020076.sg002.pdf]

Figure2 (supp)

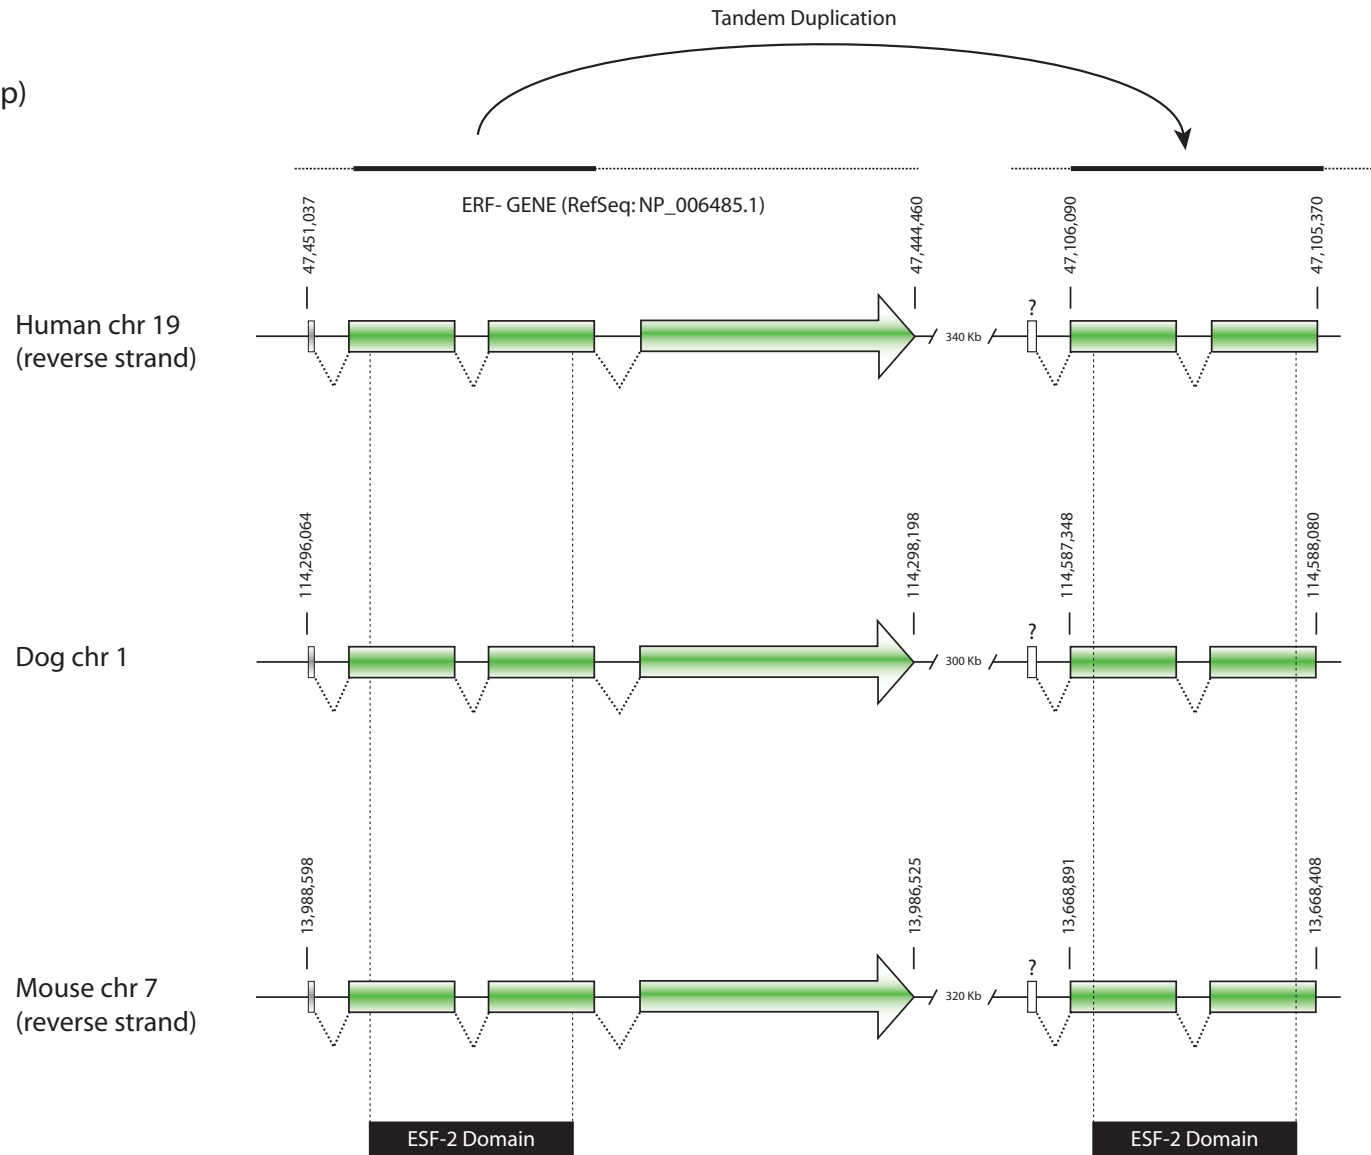

Figure S2. **Example of functional partial tandem duplicate.** The orientation of the gene is displayed on the reverse strand. Exon and intron sizes are not in scale. See text for details.
